# Supplementary material for: Efficient visible light-initiated hydrogenation of nitrobenzene for chemoselective production of aniline, azoxybenzene, azobenzene and hydrazobenzene over CQDs/CdS nanocomposites
Source: Royal Society of Chemistry journal article supplement (doi:10.1039/d3dt02163g), 2023-01-01

**Supporting Information**

**Fig. S1 The spectrum of the LED lamp.**

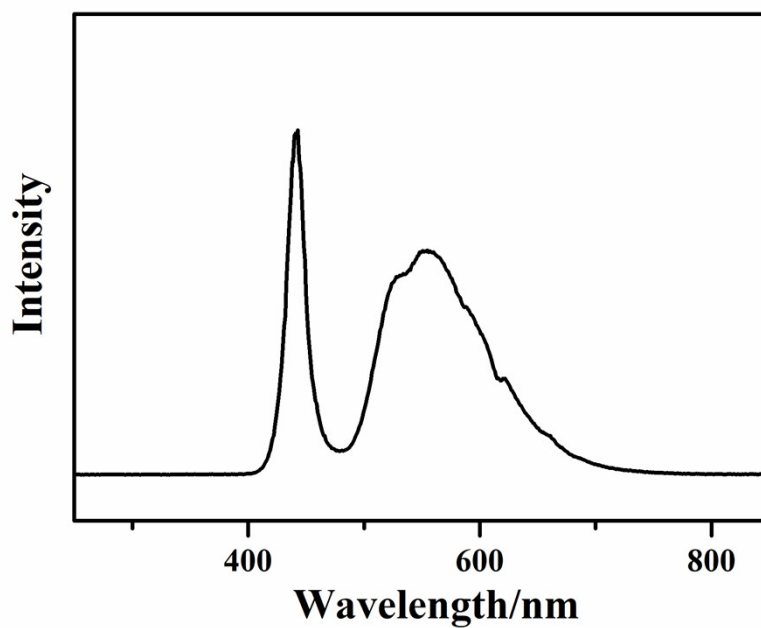

**Fig. S2(a) GC spectra of the reaction over 4.0 wt% CQDs/CdS in LA/MeCN (1:1) under white LED irradiation.**

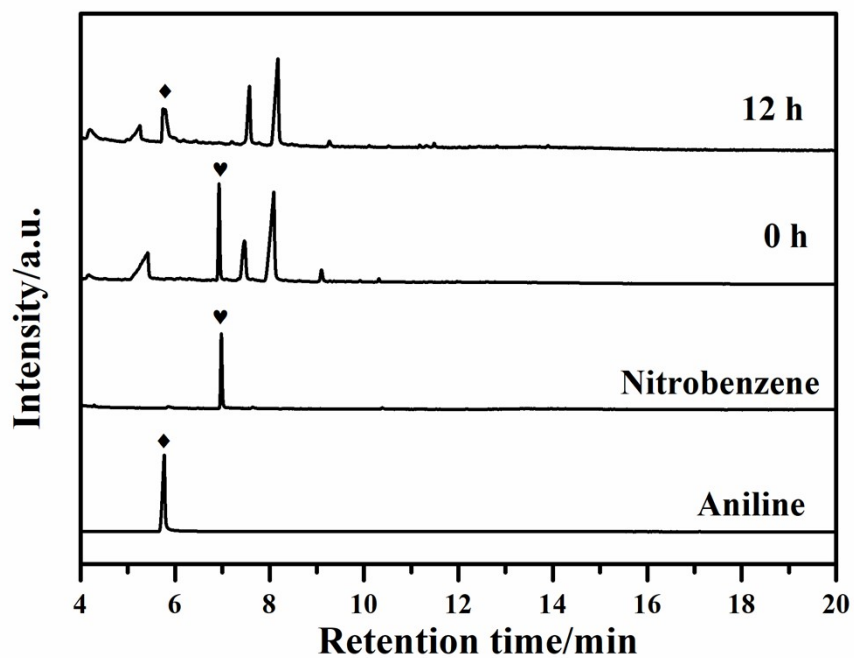

**Fig. S2(b) GC spectra of the reaction over 4.0 wt% CQDs/CdS in IPA/MeCN (1:1) under white LED irradiation.**

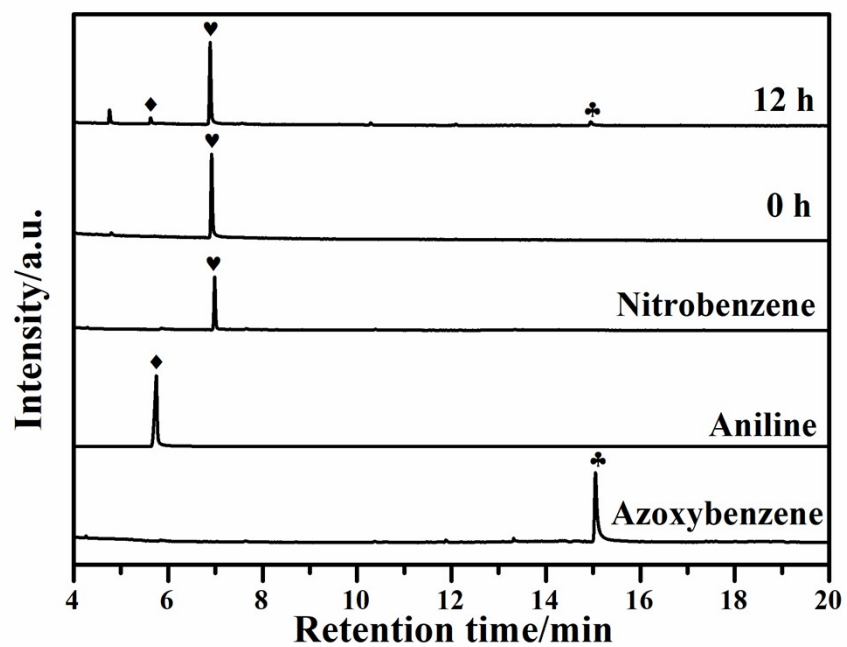

Fig. S2(c) GC spectra of the reaction over 4.0 wt% CQDs/CdS in IPA/MeCN (1:1) with 10 equiv. of NaOH under white LED irradiation.

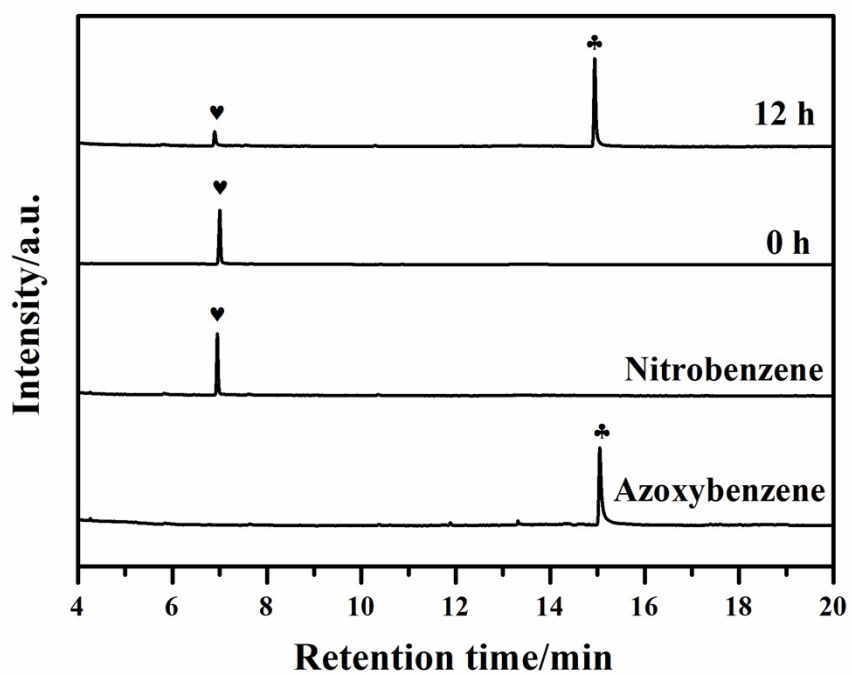

Fig. S2(d) GC spectra of the reaction over 4.0 wt% CQDs and CdS in IPA/H<sub>2</sub>O (1:1) with 30 equiv. of NaOH under white LED irradiation.

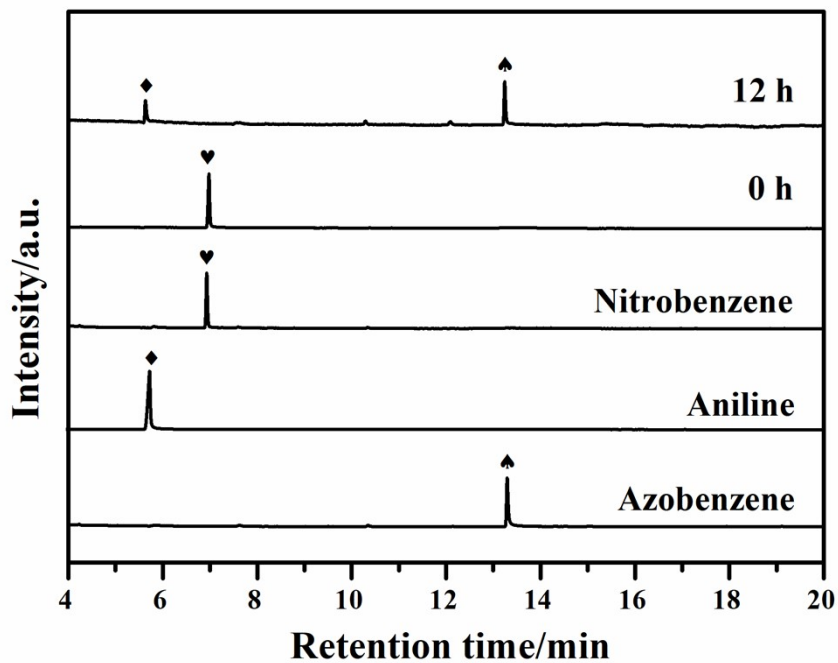

Fig. S3 The UV-vis spectra for hydrazobenzene.

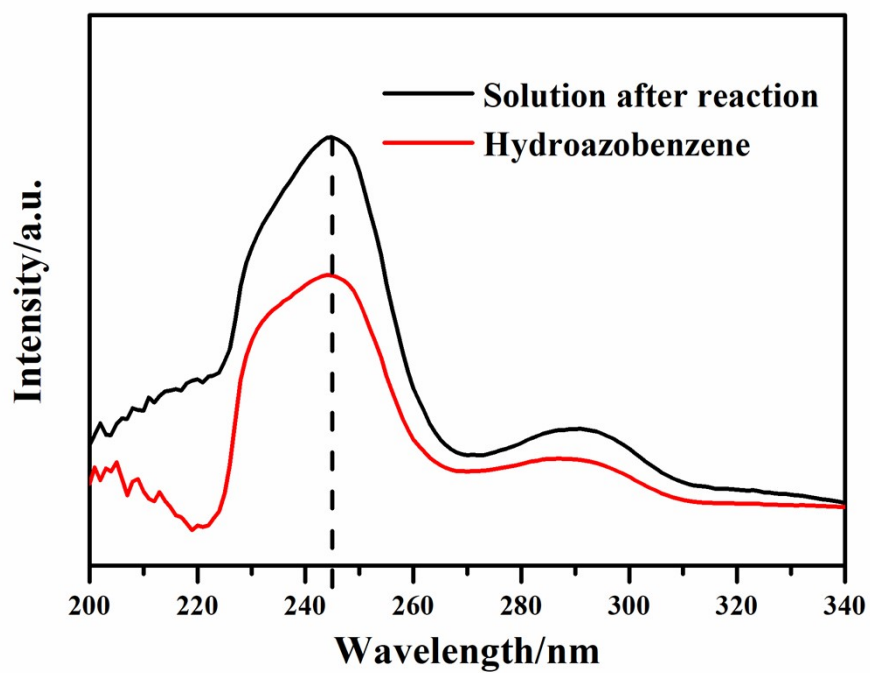

**Fig. S4** TEM images of CQDs (a) TEM image, (b) the distribution of nanoparticle sizes, (c) UV-Vis spectra.

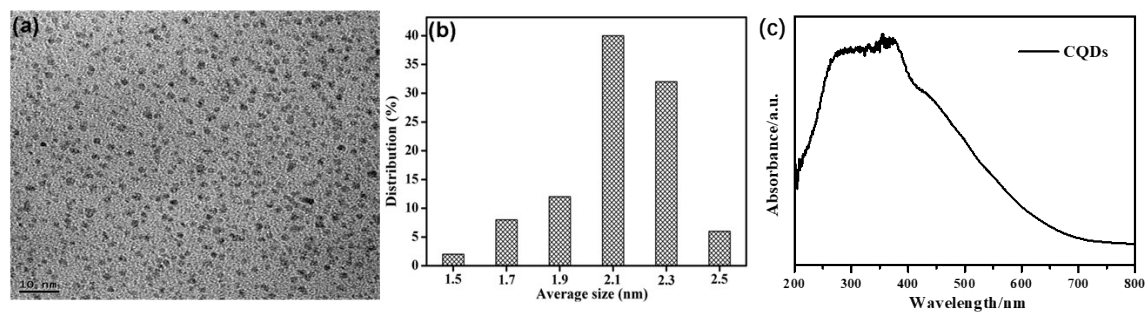

**Fig. S5** Illustration of the formation of CQDs/CdS nanocomposites.

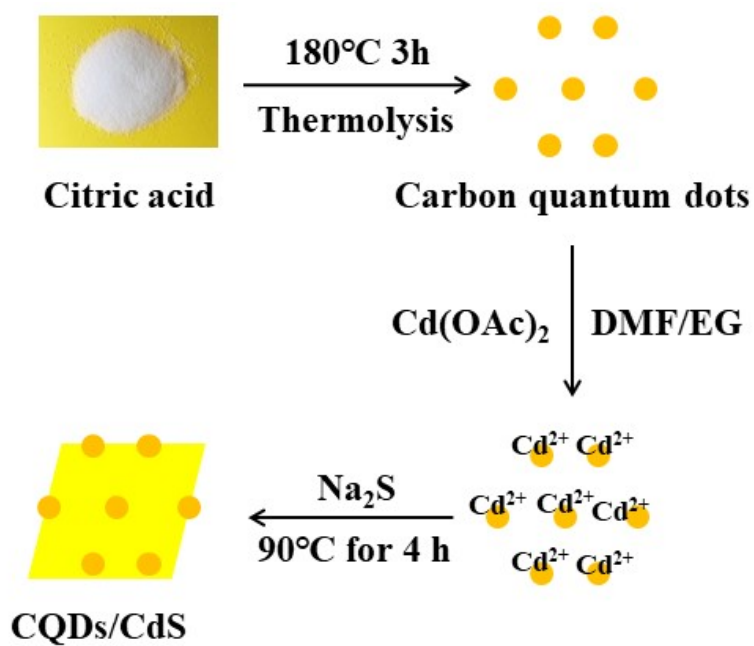



**Fig. S6** FT-IR of 2.0 wt% CQDs/CdS nanocomposites.

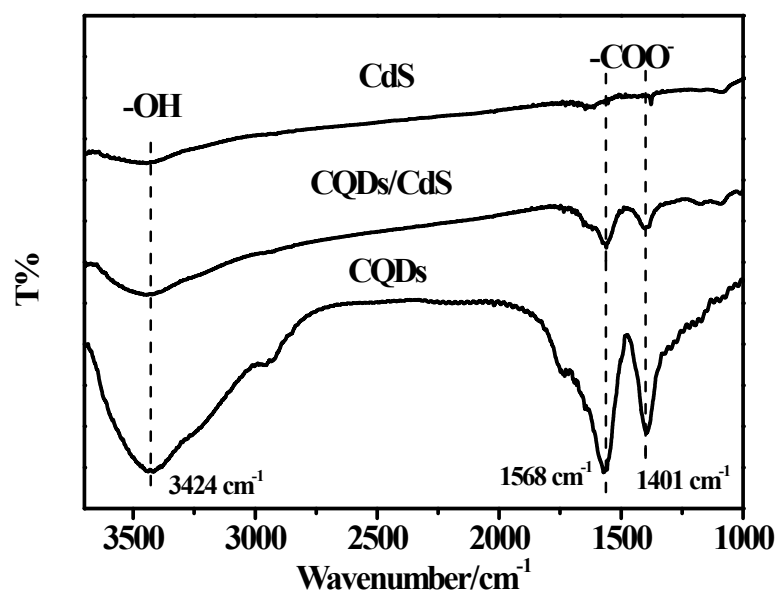

**Fig. 7** Nitrogen adsorption-desorption isotherms of CdS and 2.0 wt% CQDs/CdS nanocomposites.

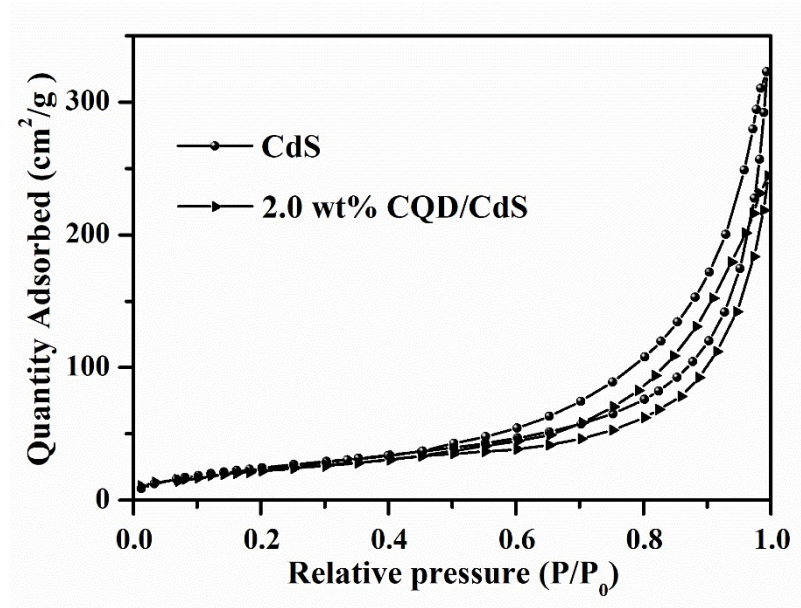

Fig. S8 Mott–Schottky plots for 2.0 wt% CQDs/CdS.

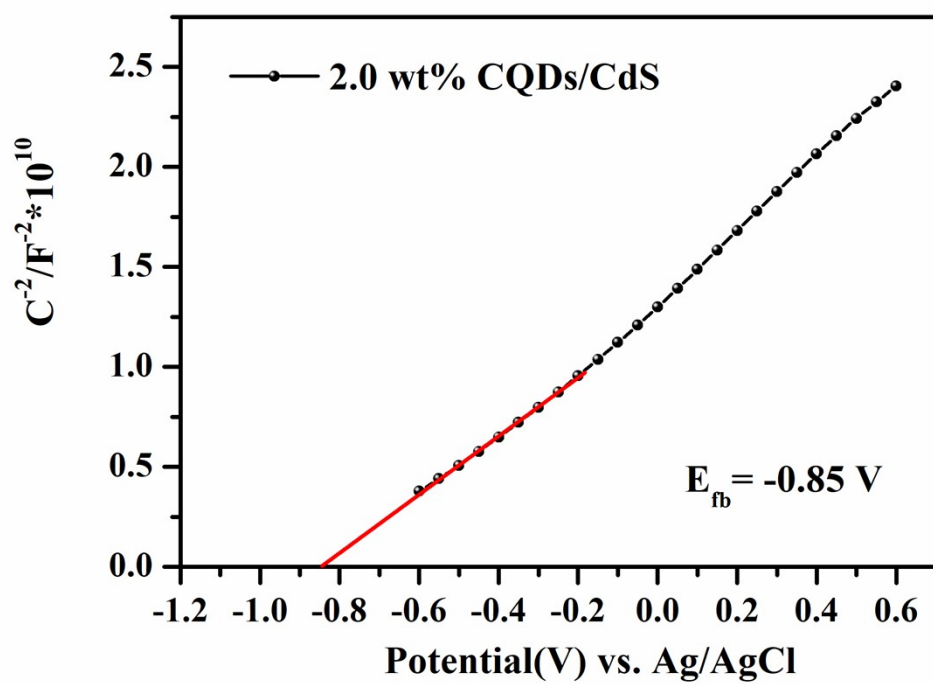

Supplement: d3dt02163g1.pdf [file d3dt02163g1.pdf]
